# Supplementary material for: Soluble forms of PD-L1 and PD-1 as prognostic and predictive markers of sunitinib efficacy in patients with metastatic clear cell renal cell carcinoma
Source: PubMed Central journal article supplement — Oncoimmunology. 2020 Nov 25;9(1):1846901. doi: 10.1080/2162402X.2020.1846901 (PMC7714499; doi:10.1080/2162402x.2020.1846901), 2020-11-25
Supplement: KONI_A_1846901_SM7003.pdf [file KONI_A_1846901_SM7003.pdf]

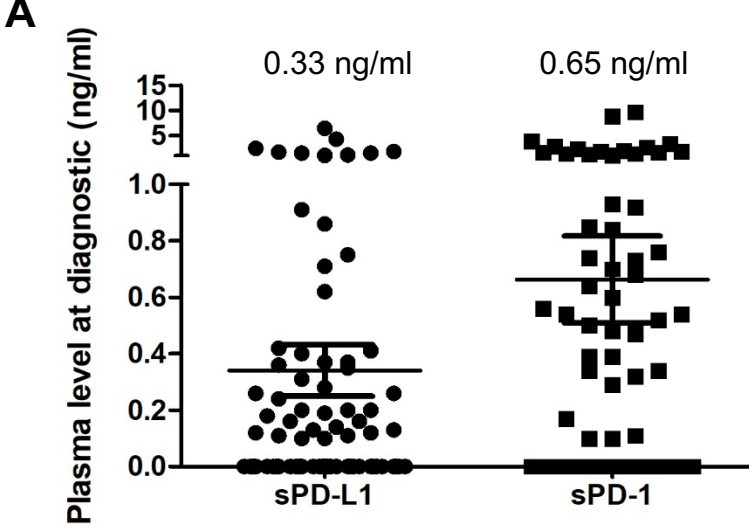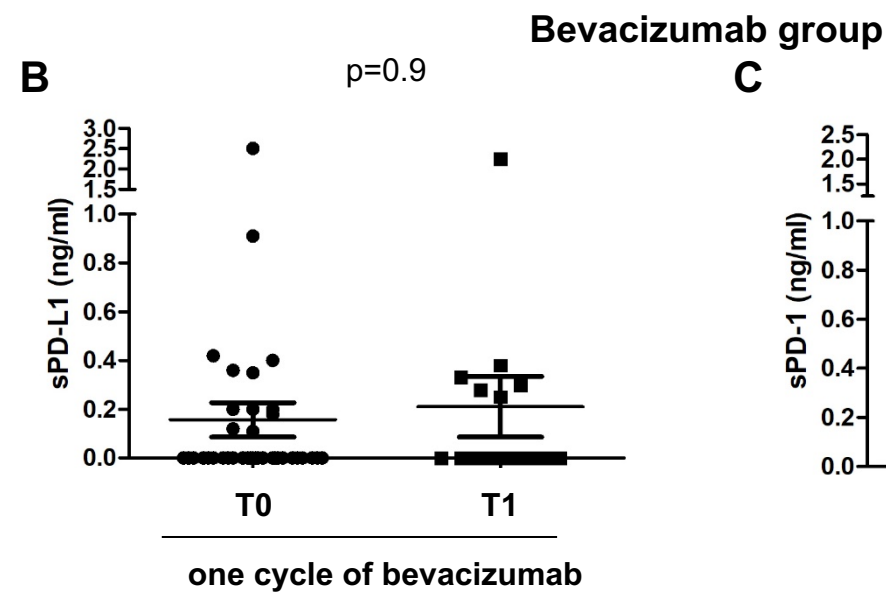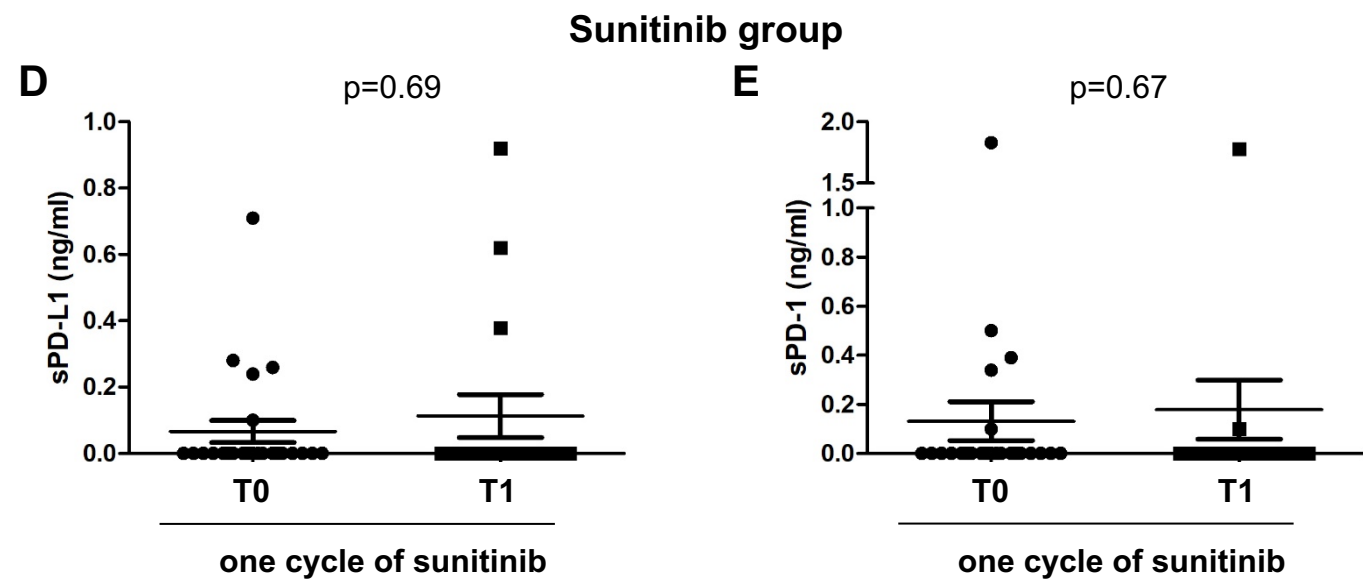

Supplementary Figure 1

## Bevacizumab group

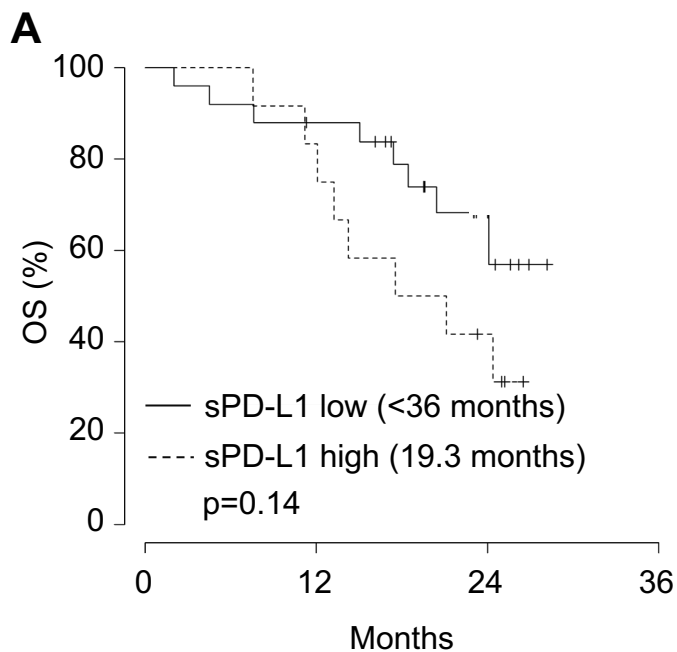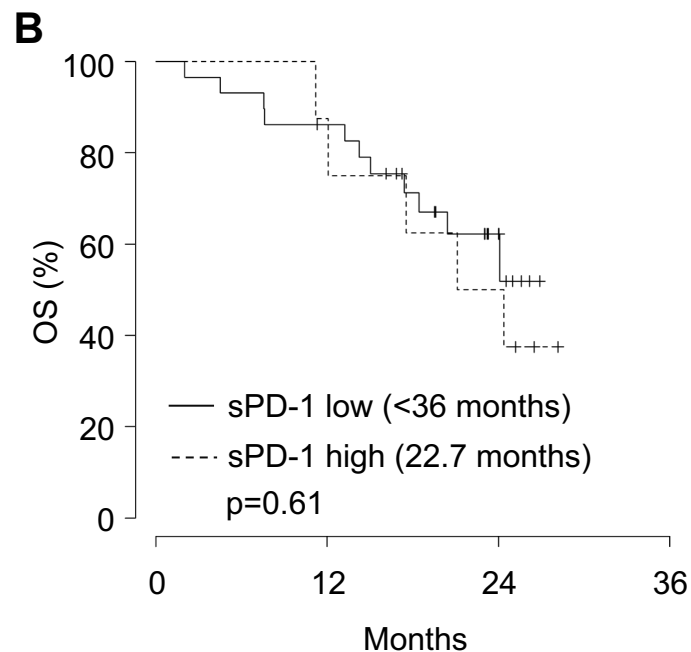

## Sunitinib group

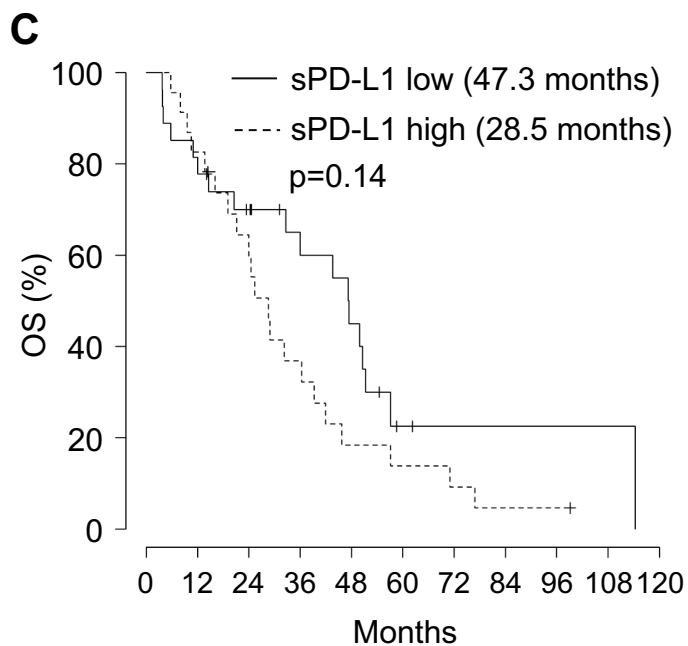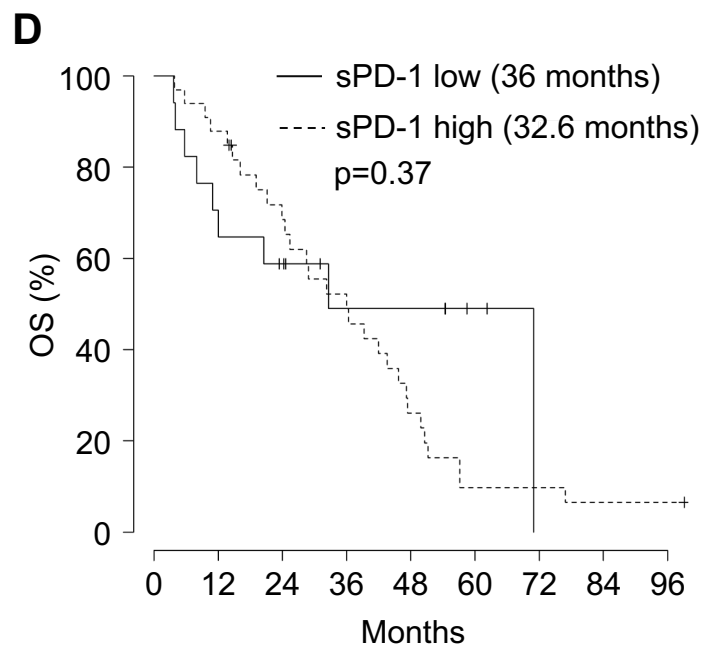

**Bevacizumab group**

| <b>A</b>             | <b>sPD-L1 &lt; 0.1 ng/ml</b> | <b>sPD-L1 &gt; 0.1 ng/ml</b> | <b>p value</b> |
|----------------------|------------------------------|------------------------------|----------------|
| <b>Number</b>        | 25                           | 12                           |                |
| <b>Age</b>           | 58.1                         | 56                           | ns             |
| <b>Sex</b>           |                              |                              |                |
| Female               | 5 (20%)                      | 10 (17.4%)                   | ns             |
| Male                 | 20 (80%)                     | 2 (82.6%)                    |                |
| <b>pT</b>            |                              |                              |                |
| 1/2                  | 9 (42.9%)                    | 3 (33.3%)                    | ns             |
| 3/4                  | 12 (57.1%)                   | 6 (66.7%)                    |                |
| x                    | 4                            | 3                            |                |
| <b>pN</b>            |                              |                              |                |
| 0                    | 21 (84%)                     | 9 (75%)                      | ns             |
| ≥ 1                  | 4 (16%)                      | 3 (25%)                      |                |
| <b>pM</b>            |                              |                              |                |
| 0                    | 15 (60%)                     | 9 (75%)                      | ns             |
| 1                    | 10 (40%)                     | 3 (25%)                      |                |
| <b>Stage</b>         |                              |                              |                |
| I+II                 | 7 (33.3%)                    | 2 (20%)                      | ns             |
| III+IV               | 14 (66.7%)                   | 8 (80%)                      |                |
| x                    | 4                            | 2                            |                |
| <b>Fuhrman grade</b> |                              |                              |                |
| 1/2                  | 6 (28.6%)                    | 1 (10%)                      | ns             |
| 3/4                  | 15 (71.4%)                   | 9 (90%)                      |                |
| x                    | 4                            | 2                            |                |
| <b>PFS (months)</b>  | 11.4                         | 7.7                          | ns             |
| <b>OS (months)</b>   | <36                          | 19.3                         | ns             |

**Supplementary Table 1**

**Bevacizumab group**

| <b>A</b>             | <b>sPD-1 &lt; 1.67 ng/ml</b> | <b>sPD-1 &gt; 1.67 ng/ml</b> | <b>p value</b> |
|----------------------|------------------------------|------------------------------|----------------|
| <b>Number</b>        | 29                           | 8                            |                |
| <b>Age</b>           | 58                           | 54.6                         | ns             |
| <b>Sex</b>           |                              |                              | ns             |
| Female               | 5 (17.2%)                    | 2 (25%)                      |                |
| Male                 | 24 (82.8%)                   | 6 (75%)                      |                |
| <b>pT</b>            |                              |                              | ns             |
| 1/2                  | 10 (43.5%)                   | 2 (28.6%)                    |                |
| 3/4                  | 13 (56.5%)                   | 5 (71.4%)                    |                |
| x                    | 6                            | 1                            |                |
| <b>pN</b>            |                              |                              | ns             |
| 0                    | 25 (86.2%)                   | 5 (62.5%)                    |                |
| ≥ 1                  | 4 (13.8%)                    | 3 (37.5%)                    |                |
| <b>pM</b>            |                              |                              | ns             |
| 0                    | 17 (58.6%)                   | 7 (87.5%)                    |                |
| 1                    | 12 (41.4%)                   | 1 (12.5%)                    |                |
| <b>Stage</b>         |                              |                              | ns             |
| I+II                 | 7 (30.4%)                    | 2 (25%)                      |                |
| III+IV               | 16 (69.6%)                   | 6 (75%)                      |                |
| x                    | 6                            | 0                            |                |
| <b>Fuhrman grade</b> |                              |                              | ns             |
| 1/2                  | 6 (25%)                      | 1 (14.3%)                    |                |
| 3/4                  | 18 (75%)                     | 6 (85.7%)                    |                |
| x                    | 5                            | 1                            |                |
| <b>PFS (months)</b>  | 11.5                         | 11.9                         | ns             |
| <b>OS (months)</b>   | <36                          | 22.7                         | ns             |

**Supplementary Table 2**
